# Supplementary material
Source: Elsevier journal article supplement (https://www.sciencedirect.com/science/article/pii/S0213911120301242)
Supplement: mmc1 [file S0213911120301242:mmc1.docx]

### Apéndice

### Tabla I

### Resultados de los modelos de regresión múltiple para las variables independientes principales y secundarias

| **Modelo de regresión múltiple para la incidencia en el periodo** | | | | | | | | | | | | | | |
| --- | --- | --- | --- | --- | --- | --- | --- | --- | --- | --- | --- | --- | --- | --- |
| **Variable dependiente: incidencia** | **B (IC95%)** | | | | **SE** | | **Beta** | | **t** | | **Sig.** | | **R2 ajustado** | |
| (Constante) | 8,226 (5,220 – 11,232) | | | | 1,402 | |  | | 5,869 | | 0,000 | | 0,832 | |
| Incidencia en el decreto | 0,530 (0,274 – 0,786) | | | | 0,119 | | 0,592 | | 4,445 | | 0,001 | |  | |
| Temperatura promedio | -1,657 (-2,771 – -0,544) | | | | 0,519 | | -0,425 | | -3,192 | | 0,007 | |  | |
| Todas las variables en forma logarítmica | | | | | | | | | | | | | | |
| **Modelo de regresión múltiple para la mortalidad en el periodo** | | | | | | | | | | | | | | |
| **Variable dependiente: mortalidad** | | **B (IC95%)** | | | **SE** | | **Beta** | | **t** | | **Sig.** | | **R2 ajustado** | |
| (Constante) | | 2,605 (1,372 – 3,838) | | | 0,566 | |  | | 4,603 | | 0,001 | | 0,821 | |
| Mortalidad en el decreto | | 0,425 (0,190 – 0,632) | | | 0,095 | | 0,603 | | 4,490 | | 0,001 | |  | |
| Mayores en residencias | | 1,080 (0,366 – 1,794) | | | 0,328 | | 0,443 | | 3,297 | | 0,006 | |  | |
| Todas las variables en forma logarítmica | | | | | | | | | | | | | | |
| **Modelo de regresión múltiple para los pacientes ingresados en hospitales en el periodo** | | | | | | | | | | | | | | | |
| **Variable dependiente: pacientes ingresados en hospitales** | | | **B (IC95%)** | | | **SE** | | **Beta** | | **t** | | **Sig.** | | **R2 ajustado** | |
| (Constante) | | | -1,953 (-2,777 – -1,129) | | | 0,387 | |  | | -5,053 | | 0,000 | | 0,477 | |
| Incidencia en el decreto | | | 0,543 (0,250 – 0,836) | | | 0,138 | | 0,714 | | 3,945 | | 0,001 | |  | |
| Todas las variables en forma logarítmica | | | | | | | | | | | | | | | |
| **Modelo de regresión múltiple para pacientes en UCI en el periodo** | | | | | | | | | | | | | | | |
| **Variable dependiente: pacientes en UCI** | | | | **B (IC95%)** | | **SE** | | **Beta** | | **t** | | **Sig.** | | **R2 ajustado** | |
| (Constante) | | | | 3,367(-0,662 – 7,937) | | 2,005 | |  | | 1,814 | | 0,091 | | 0,367 | |
| Incidencia en el decreto | | | | 0,399(0,094 – 0,705) | | 0,142 | | 0,566 | | 2,807 | | 0,014 | |  | |
| Camas UCI | | | | -1,924 (-3,860 – -0,120) | | 0,903 | | -0,430 | | -3,297 | | 0,050 | |  | |
| Todas las variables en forma logarítmica | | | | | | | | | | | | | | | |
